# Supplementary material for: Possibility for Visualizing the Muscle Microstructure by q-Space Imaging Technique
Source: Hindawi journal article supplement (doi:10.1155/2022/7929589), 2022-08-08
Supplement: f1 [file 7929589.f1.pdf]

| type             | Age | PBF(%) | SMI  | Height | Weight | PA_TA   | PA_GAS  | PA_SOL  | Area_TA   | Area_GAS  | Area_SOL  | mDTI_RD_TA  | mDTI_RD_GAS | mDTI_RD_SOL | mHW_RD_TA   | mHW_RD_GAS  | mHW_RD_SOL  | mDTI_RD_TA | mDTI_RD_GAS | mDTI_RD_SOL |
|------------------|-----|--------|------|--------|--------|---------|---------|---------|-----------|-----------|-----------|-------------|-------------|-------------|-------------|-------------|-------------|------------|-------------|-------------|
| Control          | 21  | 13     | 9    | 165    | 67.3   | 15.6507 | 24.6875 | 26.8312 | 1086.9141 | 1988.0371 | 2194.0919 | 0.001398041 | 0.001337856 | 0.001412141 | 23.19821418 | 21.46302668 | 22.78159829 | 0.1398041  | 0.1337856   | 0.1412141   |
| Control          | 21  | 15.9   | 7.8  | 180    | 67.1   | 14.1657 | 24.5133 | 25.6552 | 741.9434  | 798.3398  | 1229.9805 | 0.001388154 | 0.001280773 | 0.001349579 | 21.4515231  | 20.7748559  | 21.46713652 | 0.1388154  | 0.1280773   | 0.1349579   |
| Control          | 22  | 28.9   | 8.1  | 165    | 71.9   | 17.0431 | 21.7591 | 28.0218 | 859.1309  | 1230.957  | 1791.0155 | 0.001319798 | 0.001330508 | 0.001421697 | 22.61393174 | 22.15368544 | 22.77899767 | 0.1319798  | 0.1330508   | 0.1421697   |
| Control          | 24  | 19.6   | 8    | 171    | 68     | 16.9722 | 25.0965 | 23.4461 | 1077.6367 | 1339.5996 | 1883.0567 | 0.001385357 | 0.001325129 | 0.001434295 | 23.34874406 | 22.00210748 | 23.03122056 | 0.1385357  | 0.1325129   | 0.1434295   |
| Control          | 21  | 11.8   | 7.4  | 179.8  | 58.2   | 13.2491 | 22.3043 | 27.1259 | 830.078   | 1172.1192 | 1631.5918 | 0.001296274 | 0.001274226 | 0.001350525 | 21.48141675 | 21.09370786 | 22.59717846 | 0.1296274  | 0.1274226   | 0.1350525   |
| Control          | 23  | 18     | 8.4  | 181.5  | 75.9   | 14.9719 | 22.4597 | 21.6953 | 1003.174  | 1351.3183 | 1703.1249 | 0.001334561 | 0.001363082 | 0.001434139 | 22.63441588 | 21.70106907 | 23.2885876  | 0.1334561  | 0.1363082   | 0.1434139   |
| Control          | 21  | 13.9   | 7.4  | 170    | 56.1   | 17.5202 | 22.0956 | 24.1472 | 1131.1034 | 1168.2129 | 1908.6914 | 0.001289796 | 0.001216542 | 0.001330076 | 22.42317325 | 20.74937864 | 22.51442016 | 0.1289796  | 0.1216542   | 0.1330076   |
| Control          | 20  | 16.4   | 8.3  | 171.5  | 66.9   | 14.5183 | 23.9645 | 23.8633 | 1020.9962 | 1521.9725 | 2231.6893 | 0.001302895 | 0.001320859 | 0.001378815 | 21.90042027 | 21.32261283 | 22.56052742 | 0.1302895  | 0.1320859   | 0.1378815   |
| Control          | 22  | 22     | 8.5  | 176    | 79.6   | 17.6196 | 22.1551 | 27.5549 | 1208.2519 | 1263.4278 | 1965.8203 | 0.001294117 | 0.001215625 | 0.001336681 | 22.40839023 | 20.65927868 | 22.54029045 | 0.1294117  | 0.1215625   | 0.1336681   |
| Control          | 21  | 11.9   | 6.5  | 160    | 45.5   | 16.2929 | 22.2584 | 26.9704 | 851.8067  | 813.2325  | 1513.9161 | 0.00130612  | 0.001325883 | 0.001334845 | 21.33811756 | 21.52536872 | 21.26475514 | 0.130612   | 0.1325883   | 0.1334845   |
| Control          | 21  | 18.6   | 6.8  | 162.5  | 54.1   | 13.9403 | 18.9116 | 25.7741 | 891.3574  | 920.8983  | 1285.6445 | 0.001291159 | 0.001308228 | 0.00142405  | 21.52753773 | 21.00056268 | 22.39950464 | 0.1291159  | 0.1308228   | 0.142405    |
| Control          | 22  | 13.7   | 7.4  | 173    | 59     | 14.3427 | 21.7405 | 20.6425 | 1002.4414 | 909.912   | 1697.5098 | 0.001411343 | 0.001313425 | 0.001449185 | 22.08463871 | 20.29647353 | 22.92972074 | 0.1411343  | 0.1313425   | 0.1449185   |
| Distance running | 22  | 11.7   | 7.4  | 168    | 56.9   | 13.7467 | 24.7334 | 26.3229 | 599.1212  | 950.9278  | 1262.4512 | 0.001289744 | 0.001310032 | 0.001387854 | 21.83407979 | 21.1001626  | 22.49169986 | 0.1289744  | 0.1310032   | 0.1387854   |
| Distance running | 21  | 9.4    | 7.4  | 171    | 54.1   | 15.3172 | 25.375  | 25.9961 | 729.4921  | 1520.2637 | 1538.3299 | 0.001325794 | 0.001342204 | 0.001443005 | 22.15187064 | 20.85794922 | 22.33718744 | 0.1325794  | 0.1342204   | 0.1443005   |
| Distance running | 19  | 12.6   | 7.1  | 164    | 52.9   | 16.1132 | 23.82   | 22.2083 | 680.9084  | 915.5273  | 1169.9219 | 0.001361538 | 0.001373662 | 0.001454054 | 22.54402043 | 22.37004353 | 23.23089345 | 0.1361538  | 0.1373662   | 0.1454054   |
| Distance running | 21  | 17.3   | 7.4  | 178    | 66.3   | 14.257  | 21.78   | 22.8069 | 999.7559  | 1042.2364 | 1567.3826 | 0.001375329 | 0.001379684 | 0.001431005 | 22.0519334  | 20.79524503 | 22.59339876 | 0.1375329  | 0.1379684   | 0.1431005   |
| Distance running | 22  | 18.3   | 6.7  | 171    | 55.7   | 13.4727 | 18.5742 | 28.7385 | 810.3029  | 1119.8731 | 1219.9707 | 0.001322264 | 0.001350553 | 0.001386764 | 21.16706064 | 21.03886469 | 21.44677199 | 0.1322264  | 0.1350553   | 0.1386764   |
| Distance running | 20  | 11.3   | 7.3  | 165    | 54.9   | 19.2305 | 23.9664 | 26.3497 | 715.8203  | 1131.1034 | 1521.2403 | 0.001332068 | 0.001332711 | 0.001459559 | 21.56525047 | 21.0916545  | 22.82463237 | 0.1332068  | 0.1332711   | 0.145959    |
| Distance running | 23  | 11.1   | 7.2  | 166    | 53.1   | 15.0001 | 17.203  | 23.6986 | 833.0079  | 1249.2675 | 1549.0723 | 0.001335696 | 0.001243589 | 0.001309558 | 21.98296274 | 21.68472793 | 22.18426818 | 0.1335696  | 0.1243589   | 0.130958    |
| Distance running | 22  | 15.4   | 7.2  | 169    | 57.1   | 17.779  | 26.1498 | 24.4274 | 654.7852  | 956.7872  | 1391.8456 | 0.00134094  | 0.001276638 | 0.001373113 | 21.82157265 | 20.47490099 | 22.04734699 | 0.134094   | 0.1276638   | 0.1373113   |
| Distance running | 22  | 17.9   | 7.3  | 173    | 62.4   | 13.583  | 25.3522 | 30.8452 | 824.4629  | 1161.377  | 1408.4472 | 0.001290992 | 0.001295022 | 0.001426614 | 22.24100133 | 21.15895221 | 22.78635995 | 0.1290992  | 0.1295022   | 0.1426614   |
| Distance running | 22  | 9.8    | 7.8  | 170    | 58     | 15.1294 | 24.5955 | 26.7042 | 750.0001  | 1385.9863 | 1790.283  | 0.001271936 | 0.001310967 | 0.001357133 | 21.72229674 | 21.34883496 | 21.72742437 | 0.1271936  | 0.1310967   | 0.1357133   |
| Power lifting    | 32  | 35.6   | 10.5 | 163    | 103.7  | 16.1193 | 23.8541 | 25.9261 | 1067.871  | 1730.4687 | 2467.7736 | 0.001522575 | 0.001317713 | 0.001356068 | 24.74258574 | 21.36852764 | 22.03843412 | 0.1522575  | 0.1317713   | 0.1356068   |
| Power lifting    | 21  | 11.8   | 9.1  | 160    | 63.5   | 13.2579 | 24.8969 | 26.4561 | 842.7733  | 1529.0528 | 1987.5489 | 0.001360233 | 0.001326425 | 0.001414133 | 22.37765634 | 21.47108272 | 22.53970451 | 0.1360233  | 0.1326425   | 0.1414133   |
| Power lifting    | 21  | 26.9   | 9.1  | 171    | 86.9   | 15.7356 | 27.5398 | 27.5883 | 1095.459  | 1713.3789 | 2259.2773 | 0.001414029 | 0.001326429 | 0.001418427 | 22.99369365 | 20.81995478 | 22.17365361 | 0.1414029  | 0.1326429   | 0.1418427   |
| Power lifting    | 26  | 12.3   | 8.7  | 170    | 69.1   | 13.4257 | 25.0788 | 26.9212 | 702.8808  | 1125.9765 | 1241.9434 | 0.00137584  | 0.001334343 | 0.001490808 | 22.37313687 | 21.41881461 | 22.94026162 | 0.137584   | 0.1334343   | 0.1490808   |
| Power lifting    | 47  | 38.2   | 11.2 | 169    | 114    | 18.5826 | 25.9664 | 29.3636 | 1528.8088 | 3016.1133 | 2973.877  | 0.001481584 | 0.001444736 | 0.001400291 | 24.02337403 | 22.24199714 | 21.66592811 | 0.1481584  | 0.1444736   | 0.1400291   |
| Power lifting    | 38  | 37.8   | 11.5 | 178    | 136.7  | 15.4213 | 22.0633 | 25.7293 | 1213.379  | 2273.9257 | 3160.1563 | 0.001476889 | 0.001443731 | 0.001393995 | 22.54701965 | 22.45846303 | 21.38171731 | 0.1476889  | 0.1443731   | 0.1393995   |
| Power lifting    | 20  | 22.6   | 8.9  | 168    | 77.6   | 15.7544 | 23.094  | 25.7629 | 1285.8886 | 1705.8105 | 2317.3827 | 0.001344924 | 0.001338422 | 0.00141846  | 22.17904958 | 21.48570372 | 22.22268234 | 0.1344924  | 0.1338422   | 0.141846    |
| Power lifting    | 42  | 23     | 10.5 | 161    | 85.9   | 15.0721 | 25.8731 | 25.8223 | 1444.8241 | 2524.414  | 2215.8204 | 0.001202409 | 0.001215447 | 0.001189182 | 23.04108922 | 22.87764108 | 22.27597129 | 0.1202409  | 0.1215447   | 0.1189182   |
| Power lifting    | 22  | 14.4   | 9    | 169.5  | 69.7   | 18.6451 | 24.1762 | 24.4939 | 1294.9219 | 1797.3633 | 1958.2518 | 0.0013378   | 0.00133332  | 0.001405002 | 22.73606175 | 21.51385024 | 22.49491612 | 0.13378    | 0.133332    | 0.1405002   |
| Power lifting    | 19  | 29.9   | 9.4  | 165    | 84.6   | 15.5284 | 24.0081 | 24.9125 | 929.4434  | 1812.9883 | 2015.6249 | 0.0012871   | 0.001281572 | 0.001323921 | 21.65586969 | 20.78662721 | 21.34981625 | 0.12871    | 0.1281572   | 0.1323921   |
| Power lifting    | 18  | 18.4   | 8.1  | 157    | 59.7   | 16.3743 | 20.5445 | 23.6123 | 577.8808  | 856.6896  | 1119.6289 | 0.001356001 | 0.001359658 | 0.001478389 | 20.76915162 | 22.00623697 | 23.14926852 | 0.1356001  | 0.1359658   | 0.1478389   |
| Teenager         | 13  | 12     | 6.8  | 161    | 48.3   | 15.6065 | 16.4202 | 21.4689 | 498.7793  | 820.8009  | 1212.6464 | 0.001300651 | 0.001238197 | 0.001321774 | 21.59315248 | 20.7178792  | 22.11797454 | 0.1300651  | 0.1238197   | 0.1321774   |
| Teenager         | 13  | 13.4   | 7.3  | 157    | 51.5   | 12.4501 | 22.1733 | 27.8939 | 497.8027  | 798.0955  | 1571.289  | 0.001464359 | 0.00139096  | 0.001400178 | 22.25632481 | 22.07050301 | 22.51479049 | 0.1464359  | 0.139096    | 0.1400178   |
| Teenager         | 13  | 12.7   | 5.7  | 163    | 42.7   | 10.7879 | 17.7404 | 17.4425 | 590.0879  | 546.1425  | 875.4883  | 0.001135136 | 0.001219485 | 0.001320782 | 19.28367223 | 19.81658279 | 21.16039643 | 0.1135136  | 0.1219485   | 0.1320782   |
| Teenager         | 13  | 25.7   | 6.2  | 163    | 56.3   | 17.132  | 15.7707 | 20.6361 | 416.7479  | 940.6738  | 1226.0741 | 0.001228062 | 0.001253084 | 0.001348211 | 20.16984848 | 20.18343024 | 21.91441938 | 0.1228062  | 0.1253084   | 0.1348211   |
| Teenager         | 13  | 16.9   | 5.4  | 160    | 42.9   | 13.6222 | 20.3302 | 18.5535 | 593.0176  | 753.1738  | 1217.5293 | 0.001228789 | 0.001215777 | 0.001315155 | 19.53509377 | 19.66904029 | 21.88300536 | 0.1228789  | 0.1215777   | 0.1315155   |
| Teenager         | 13  | 6.8    | 6.9  | 173    | 51.1   | 14.8734 | 23.4978 | 17.3226 | 440.6738  | 767.0899  | 1074.2188 | 0.001297772 | 0.001394873 | 0.001483608 | 20.74165923 | 21.1912397  | 22.19727233 | 0.1297772  | 0.1394873   | 0.1483608   |
| Teenager         | 13  | 21.3   | 6    | 159    | 50.7   | 13.7672 | 15.6823 | 21.454  | 566.1622  | 854.0039  | 1188.9648 | 0.001235886 | 0.001293485 | 0.001376905 | 20.1606065  | 21.08310941 | 22.41368567 | 0.1235886  | 0.1293485   | 0.1376905   |
| Teenager         | 13  | 20     | 5.8  | 162    | 46.9   | 12.2046 | 16.7778 | 19.0614 | 600.83    | 770.7522  | 1105.4688 | 0.001209977 | 0.001270622 | 0.001385405 | 20.38135199 | 20.71990189 | 22.41277349 | 0.1209977  | 0.1270622   | 0.1385405   |
| Teenager         | 13  | 23.5   | 6.8  | 167    | 60.1   | 17.0529 | 19.3568 | 23.7775 | 678.7108  | 811.5234  | 1233.1543 | 0.001206577 | 0.001297233 | 0.001333793 | 19.55502129 | 20.855767   | 21.84459347 | 0.1206577  | 0.1297233   | 0.1333793   |
| Teenager         | 13  | 11.5   | 5.9  | 152    | 41.3   | 12.0812 | 17.5512 | 18.4863 | 494.1405  | 790.2833  | 1132.5683 | 0.001229021 | 0.001382518 | 0.001414378 | 20.46159578 | 21.51823867 | 22.53926726 | 0.1229021  | 0.1382518   | 0.14378     |
